# Supplementary material for: Assembly of encapsulated water in hybrid bisamides: helical and zigzag water chains
Source: Royal Society of Chemistry journal article supplement (doi:10.1039/c4ce01950d), 2014-12-22
Supplement: c4ce01950d1.pdf [file c4ce01950d1.pdf]

## Supporting information

# Assembly of encapsulated water in hybrid bisamides: Helical and zigzag water chains

Santu Bera, Sibaprasad Maity and Debasish Haldar\*

Department of Chemical Sciences, Indian Institute of Science Education and Research  
Kolkata, Mohanpur, West Bengal 741252, India,

Fax: (+)913325873020; Tel: +913325873119;

E-mail: [deba\\_h76@yahoo.com](mailto:deba_h76@yahoo.com); [deba\\_h76@iiserkol.ac.in](mailto:deba_h76@iiserkol.ac.in)

### Table of contents

|            |    |            |    |
|------------|----|------------|----|
| Figure S1  | 2  | Figure S16 | 10 |
| Figure S2  | 3  | Figure S17 | 11 |
| Figure S3  | 3  | Figure S18 | 12 |
| Figure S4  | 4  | Scheme 1   | 13 |
| Figure S5  | 4  | Figure S19 | 14 |
| Figure S6  | 5  | Figure S20 | 14 |
| Figure S7  | 5  | Figure S21 | 15 |
| Figure S8  | 6  | Figure S22 | 15 |
| Figure S9  | 6  | Figure S23 | 16 |
| Figure S10 | 7  | Figure S24 | 16 |
| Table 1    | 7  | Figure S25 | 17 |
| Figure S11 | 7  | Figure S26 | 17 |
| Figure S12 | 8  | Figure S27 | 18 |
| Figure S13 | 8  | Figure S28 | 18 |
| Figure S14 | 9  | Figure S29 | 19 |
| Figure S15 | 10 | Figure S30 | 19 |

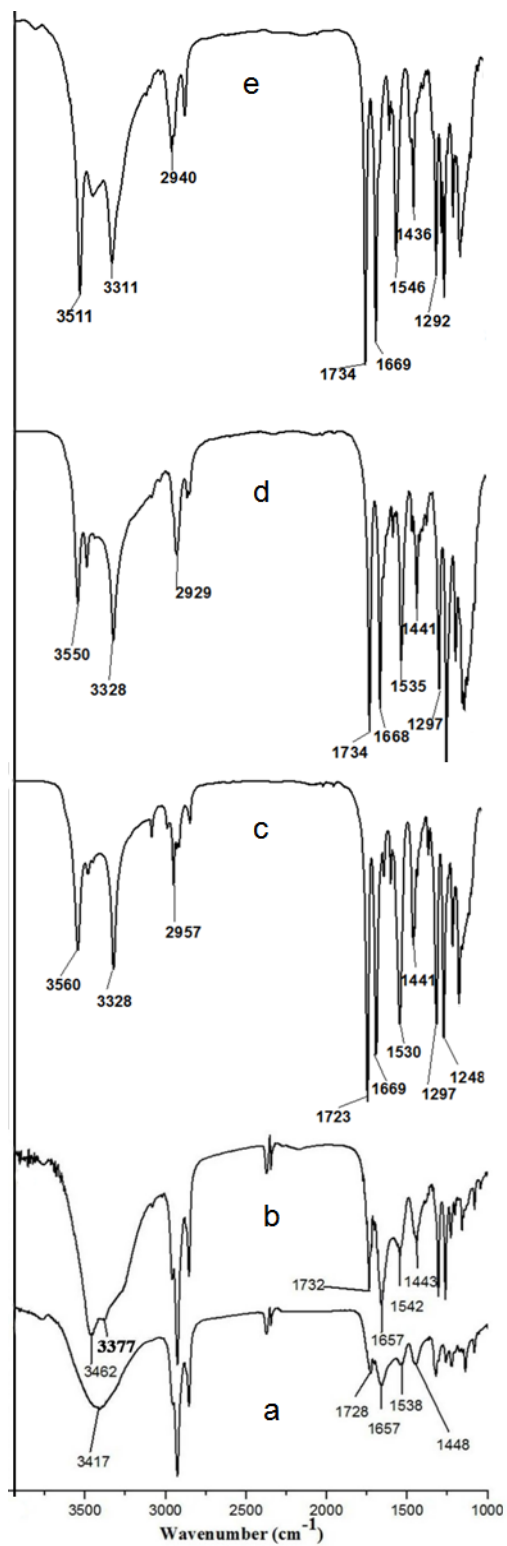

**Figure S1.** FT-IR spectra of (a) as synthesized bisamide **1**. (b), (c), (d) and (e) FT-IR spectra of solid obtained from methanol-water solution of bisamides **1-4** respectively.

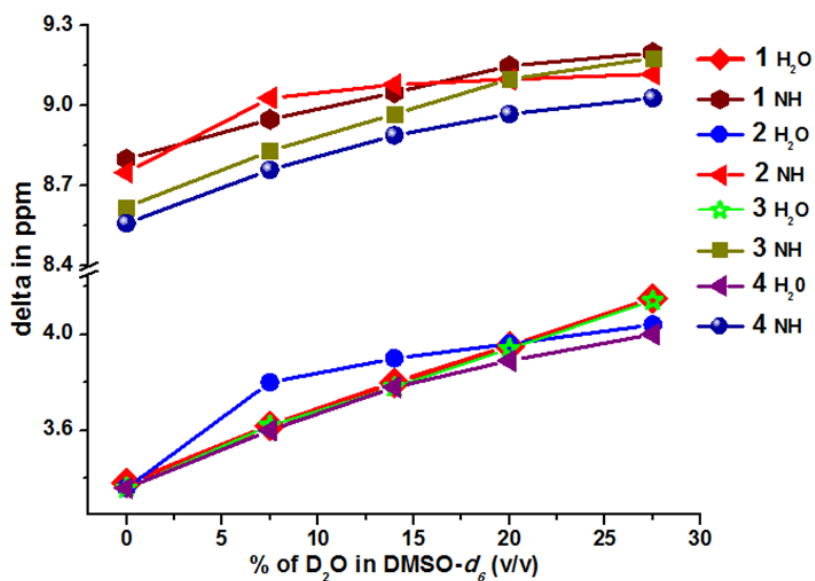

**Figure S2.** Plot of solvent dependence of NH chemical shifts for bisamides **1** - **4** and OH of water at varying concentrations of D<sub>2</sub>O in (CD<sub>3</sub>)<sub>2</sub>SO solutions.

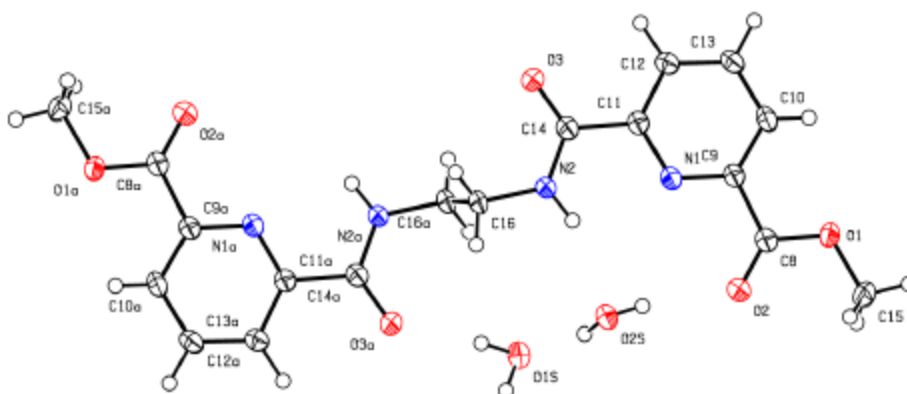

**Figure S3:** ORTEP diagram of bisamide **1** showing the atomic numbering scheme. Ellipsoids are drawn at the 50 % probability level. Equivalent position is invoked by the additional “a” letters in the atom labels is (-x,-y,-z).

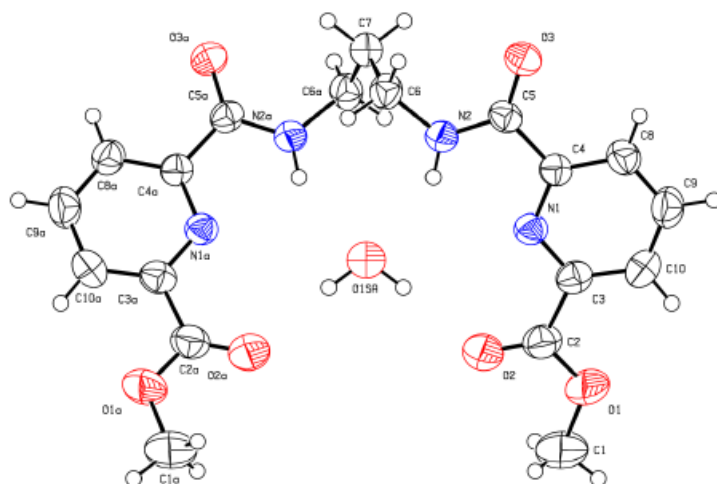

**Figure S4:** ORTEP diagram of bisamide **2** showing the atomic numbering scheme. Ellipsoids are drawn at the 50 % probability level. Equivalent position is invoked by the additional “a” letters in the atom labels is (2-x, 2-y, z).

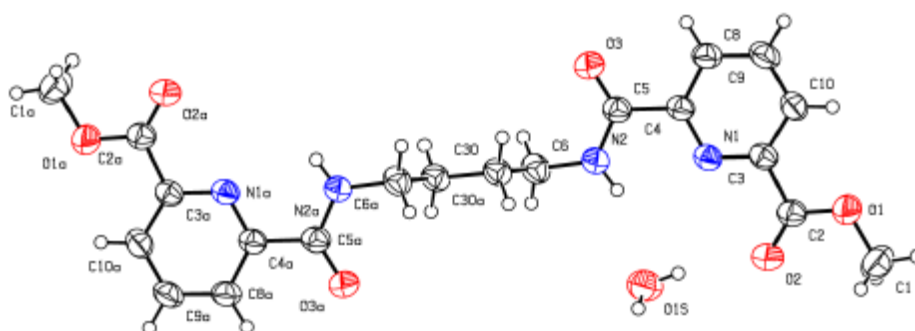

**Figure S5:** ORTEP diagram of bisamide **3** showing the atomic numbering scheme. Ellipsoids are drawn at the 50 % probability level. Equivalent position is invoked by the additional “a” letters in the atom labels is (-x, -1-y, -z).

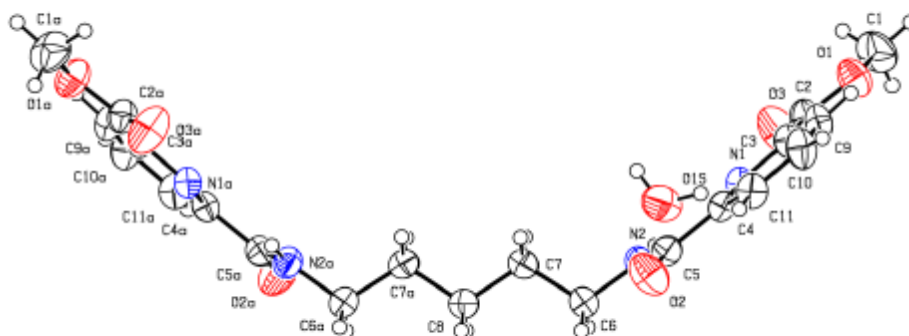

**Figure S6:** ORTEP diagram of bisamide **4** showing the atomic numbering scheme. Ellipsoids are drawn at the 50 % probability level. Equivalent position is invoked by the additional “a” letters in the atom labels is (1-x, y, -z).

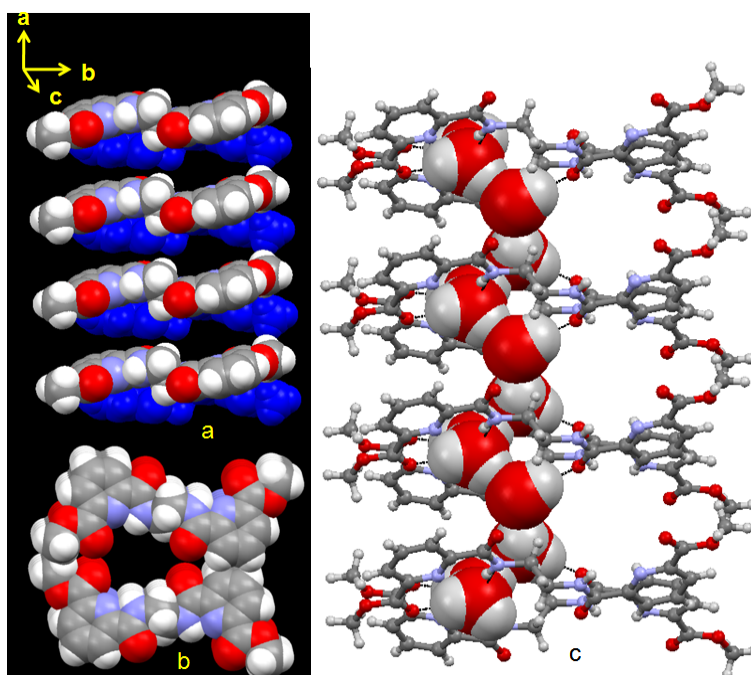

**Figure S7:** (a) and (b) The side and top view of superstructure of bisamide **1**. The water molecules have been omitted for clarity. (c) The side view of the packing presentation of water channel of bisamide **1**. Hydrogen bonds are shown as black dotted lines.

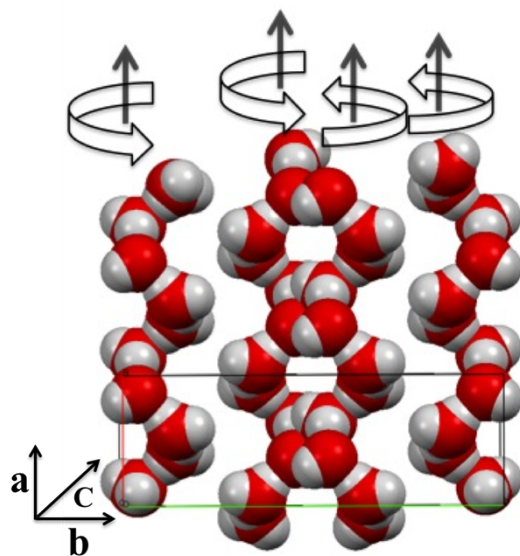

**Figure S8:** Packing of four helical water chains in the unit cell showing both left and right handedness. The molecules of bisamide **1** have been omitted for clarity.

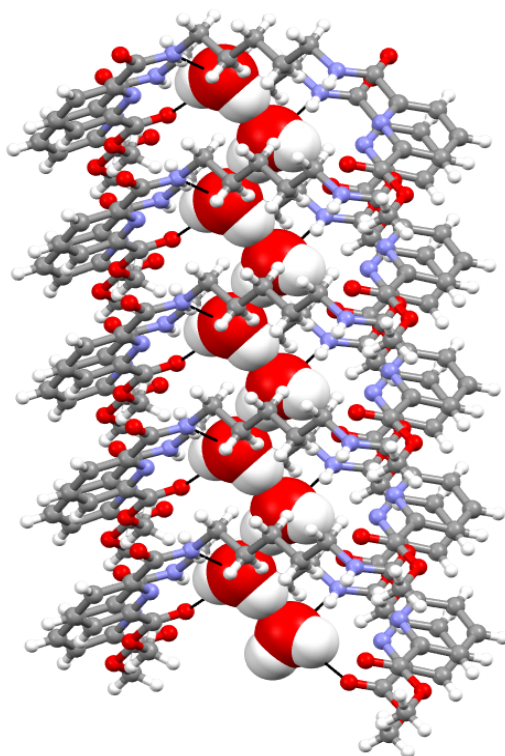

**Figure S9:** The side view of the packing presentation of water channel of bisamide **4**. Hydrogen bonds are shown as black dotted lines.

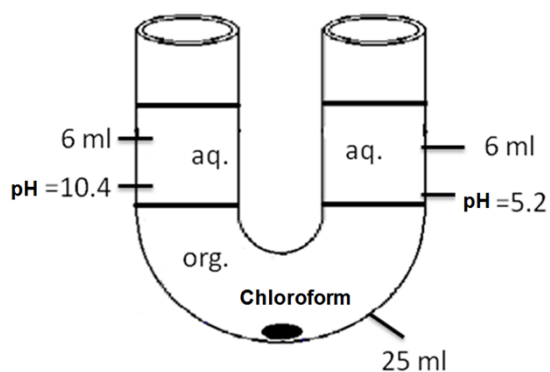

**Figure S10:** U-tube experiment setup for the determination of proton transport rates under pH gradients.

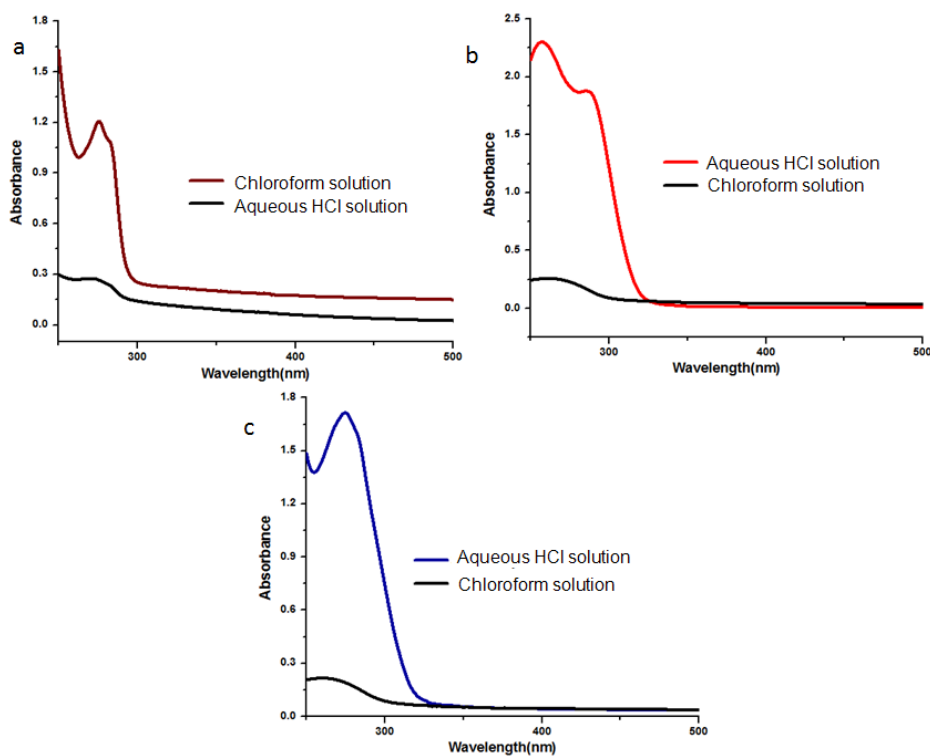

**Figure S11:** UV-Vis spectra of aqueous HCl part and chloroform part after the U-tube experiments of (a) bisamide **1**, (b) bisamide **2** and (c) bisamide **4** showing that the solubility of bisamide.HCl in aqueous HCl part is not significant with respect to the solubility of bisamides in chloroform part. Also the solubility in aqueous HCl part is very close for bisamides **1-4**.

**Table 1:** Result of transport experiment of bisamides.

| SL. no. | bisamide | Conc.(mmol)          | $K_1^c$ (day <sup>-1</sup> ) |
|---------|----------|----------------------|------------------------------|
| 1       | 1        | $6.0 \times 10^{-3}$ | $6.410 \times 10^{-1}$       |
| 2       | 2        | $6.0 \times 10^{-3}$ | $1.836 \times 10^{-1}$       |
| 3       | 3        | $6.0 \times 10^{-3}$ | $2.452 \times 10^{-1}$       |
| 4       | 4        | $6.0 \times 10^{-3}$ | $26.060 \times 10^{-1}$      |

<sup>c</sup>Data obtained by fitting the curve to eqn (1) with Origin 8. For control,  $K_2 = 1.823 \times 10^{-1}$  day<sup>-1</sup>.

**Rate constant calculations:**

Control experiment was carried out without bisamide. The transport rate of solvent ( $k_{\text{CHCl}_3} = 1.823 \times 10^{-1}$  day<sup>-1</sup>) was determined by fitting the curve obtained ( $t = 1$  day to  $t = 13$  day) to Equation (1) using Origin 8 software, where  $(1/t_1) = k_{\text{CHCl}_3}$ .

$$y = y_0 + Ae^{-x/t} \dots\dots\dots(1)$$

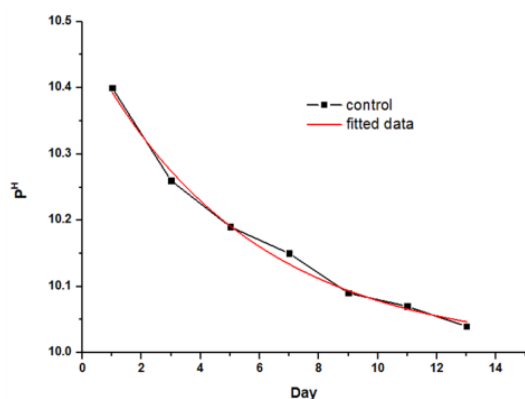

| Model             | ExpDec1                     |          |            |
|-------------------|-----------------------------|----------|------------|
| Equation          | $Y = A1 * \exp(-x/t1) + y0$ |          |            |
| Reduced chi-sqr   | 1.46094E-4                  |          |            |
| Adj. R-Squ        | 0.99078                     |          |            |
|                   |                             | Value    | Standard E |
| CDCl <sub>3</sub> | y0                          | 10.00296 | 0.02343    |
| CDCl <sub>3</sub> | A1                          | 0.46898  | 0.0197     |
| CDCl <sub>3</sub> | t1                          | 5.48398  | 0.79876    |

**Figure S12:** Fitting of pH vs time plot for CHCl<sub>3</sub> using Origin 8 and the table shows fitting results.

Proton transport rates through the water channel of bisamides were determined by fitting the curves obtained to Eqn. (2), using Origin 8 software, where  $(1/t_1) = k_{\text{CHCl}_3} = 1.823 \times 10^{-1}$ ;  $(1/t_2) = k_{\text{bisamide}}$ . Only the value for  $t_1$  was kept fixed at 5.484 for the fits.

$$y = y_0 + A_1e^{-x/t_1} + A_2e^{-x/t_2} \dots\dots\dots(2)$$



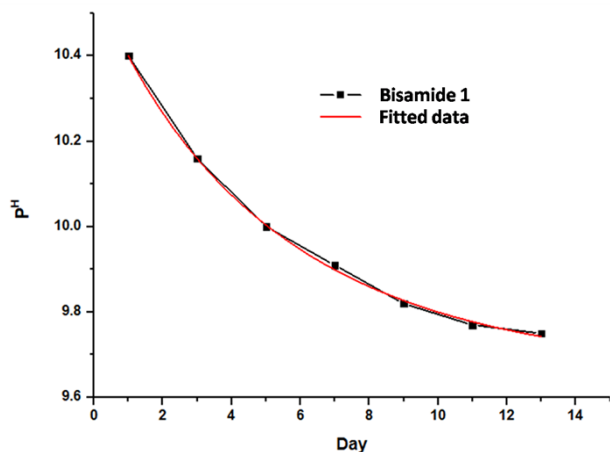

| Model           | ExpDec2                                                |         |            |
|-----------------|--------------------------------------------------------|---------|------------|
| Equation        | $Y = A1 \cdot \exp(-x/t1) + A2 \cdot \exp(-x/t2) + y0$ |         |            |
| Reduced chi-sqr | 9.68421E-5                                             |         |            |
| Adj. R-Squ      | 0.99827                                                |         |            |
|                 |                                                        | Value   | Standard E |
| Bisamide 1      | y0                                                     | 9.66467 | 0.01526    |
| Bisamide 1      | A1                                                     | 0.83723 | 0.09603    |
| Bisamide 1      | t1                                                     | 5.48398 | 0          |
| Bisamide 1      | A2                                                     | 0.07157 | 0.05196    |
| Bisamide 1      | t2                                                     | 1.55741 | 3.35797    |

**Figure S13:** Fitting of pH vs time plot for bisamide 1 and the fitting results table.

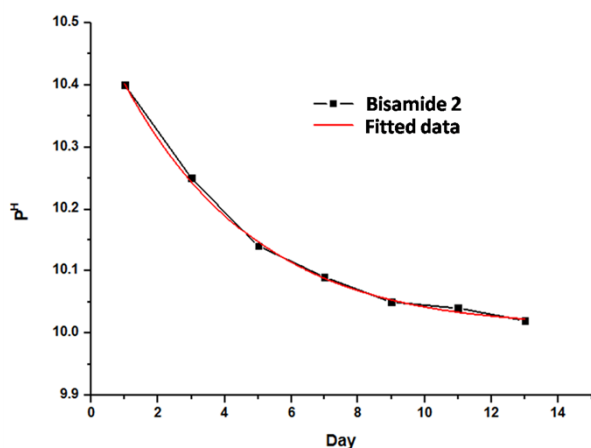

| Model           | ExpDec2                                                |           |            |
|-----------------|--------------------------------------------------------|-----------|------------|
| Equation        | $Y = A1 \cdot \exp(-x/t1) + A2 \cdot \exp(-x/t2) + y0$ |           |            |
| Reduced chi-sqr | 5.03214E-5                                             |           |            |
| Adj. R-Squ      | 0.99737                                                |           |            |
|                 |                                                        | Value     | Standard E |
| Bisamide 2      | y0                                                     | 10.01975  | 0.06629    |
| Bisamide 2      | A1                                                     | -27.53099 | 4421.0971  |
| Bisamide 2      | t1                                                     | 5.48398   | 0          |
| Bisamide 2      | A2                                                     | 28.02517  | 4421.01856 |
| Bisamide 2      | t2                                                     | 5.44584   | 5.97705    |

**Figure S14:** Fitting of pH vs time plot for bisamide 2 using Origin 8 and the table showing fitting results.

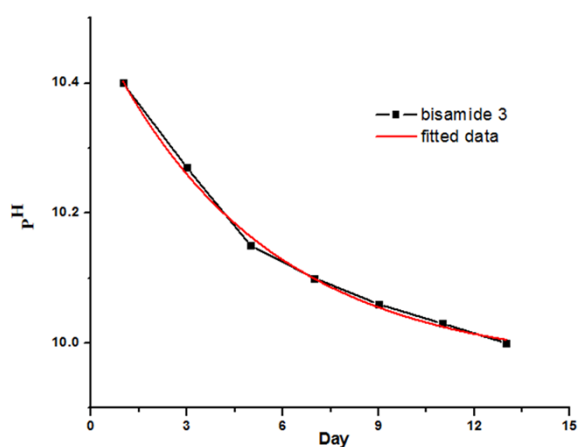

| Model           | ExpDec2                                                |         |            |
|-----------------|--------------------------------------------------------|---------|------------|
| Equation        | $Y = A1 \cdot \exp(-x/t1) + A2 \cdot \exp(-x/t2) + y0$ |         |            |
| Reduced chi-sqr | 1.24238E-4                                             |         |            |
| Adj. R-Squ      | 0.994                                                  |         |            |
|                 |                                                        | Value   | Standard E |
| Bisamide 3      | y0                                                     | 9.96134 | 0.06217    |
| Bisamide 3      | A1                                                     | 0.41416 | 3.06281    |
| Bisamide 3      | t1                                                     | 5.48398 | 0          |
| Bisamide 3      | A2                                                     | 0.12244 | 2.97863    |
| Bisamide 3      | t2                                                     | 4.07852 | 27.50548   |

**Figure S15:** Fitting of pH vs time plot for bisamide 3 using Origin 8 and the table showing fitting results.

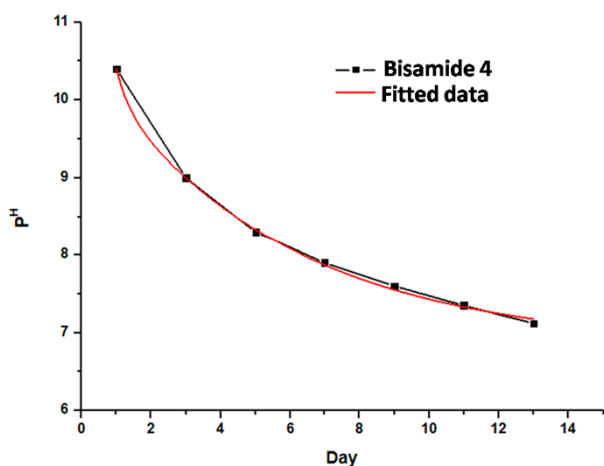

|                   |                                                        |         |            |
|-------------------|--------------------------------------------------------|---------|------------|
| Model             | ExpDec2                                                |         |            |
| Equation          | $Y = A1 \cdot \exp(-x/t1) + A2 \cdot \exp(-x/t2) + y0$ |         |            |
| Reduced chi-sqr   | 0.00255                                                |         |            |
| Adj. R-Squ        | 0.99805                                                |         |            |
|                   |                                                        | Value   | Standard E |
| <b>Bisamide 4</b> | y0                                                     | 6.82707 | 0.05082    |
| <b>Bisamide 4</b> | A1                                                     | 3.75027 | 0.20751    |
| <b>Bisamide 4</b> | t1                                                     | 5.48398 | 0          |
| <b>Bisamide 4</b> | A2                                                     | 6.06274 | 113.49905  |
| <b>Bisamide 4</b> | t2                                                     | 0.38379 | 2.79269    |

**Figure S16:** Fitting of pH vs time plot for bisamide 4 using Origin 8 and the table showing fitting results.

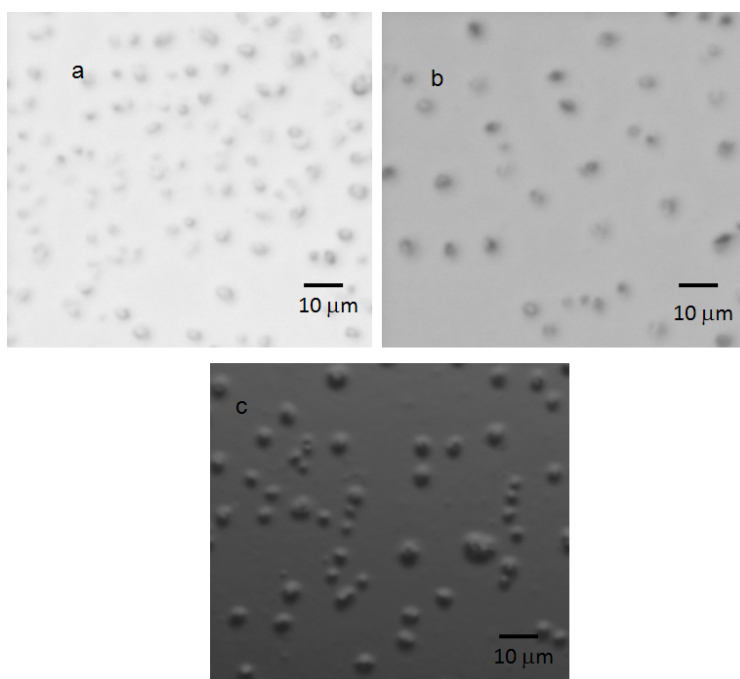

**Figure S17:** The microscopic image of (a) bisamide 2, (b) bidamide 3 and (c) bisamide 4 from dry methanol solution showing polydisperse microspheres.

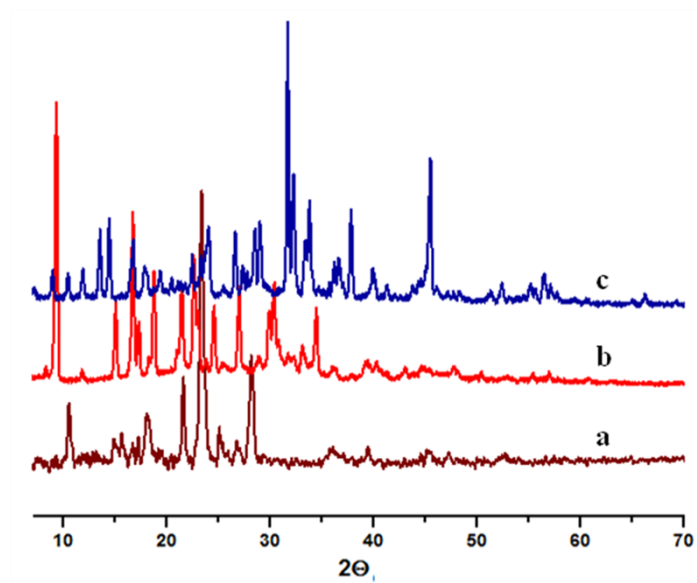

**Figure S18:** PXRD pattern of (a) bisamide 1 (b) bisamide 2 (c) bisamide 3.

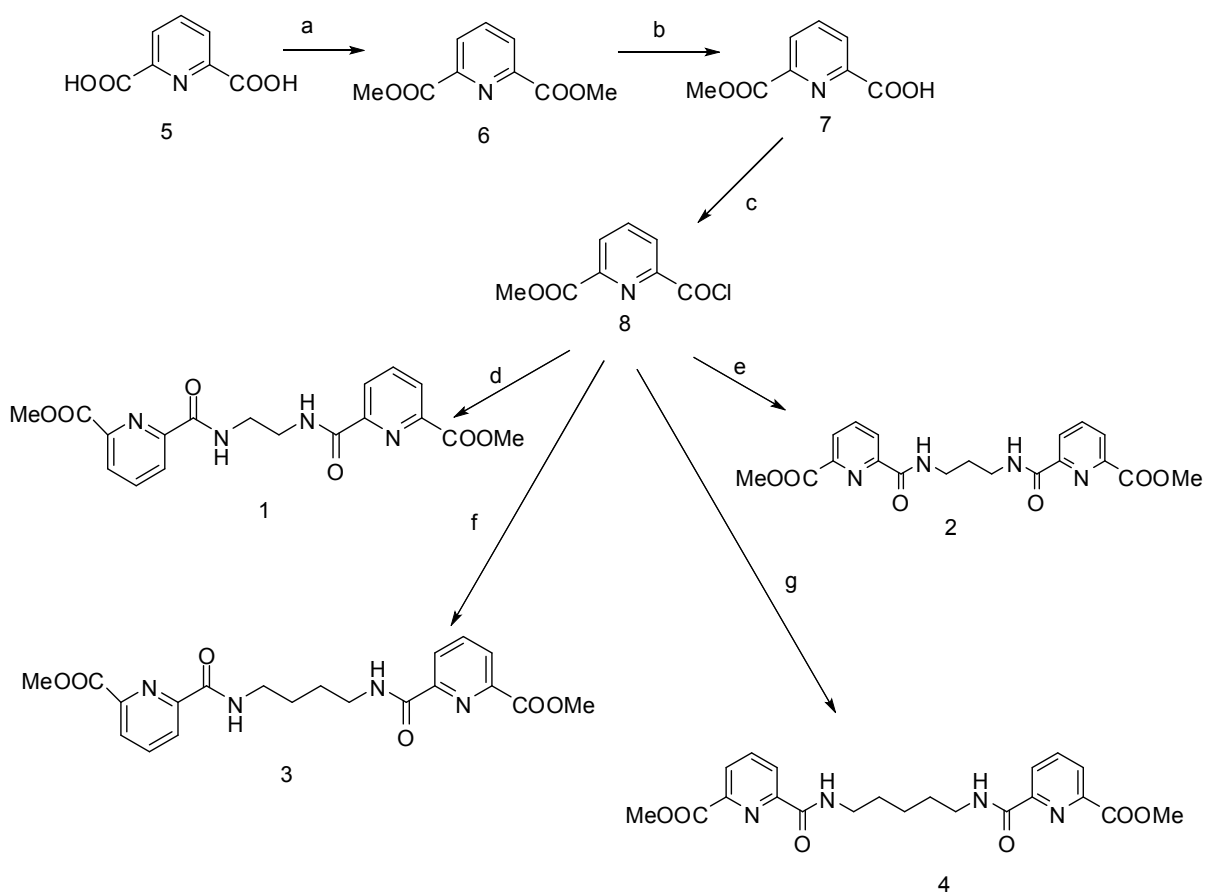

**Scheme 1.** The synthesis of bisamides **1-4**. *Reagents and conditions:* (a) MeOH, SOCl<sub>2</sub>, 0°C; (b) NaOH (1 eqv.), MeOH: H<sub>2</sub>O (9:1); (c) SOCl<sub>2</sub>, reflux; (d) H<sub>2</sub>NCH<sub>2</sub>CH<sub>2</sub>NH<sub>2</sub>, Et<sub>3</sub>N, DCM; (e) H<sub>2</sub>NCH<sub>2</sub>CH<sub>2</sub>CH<sub>2</sub>NH<sub>2</sub>, Et<sub>3</sub>N, DCM; (f) H<sub>2</sub>NCH<sub>2</sub>CH<sub>2</sub>CH<sub>2</sub>CH<sub>2</sub>NH<sub>2</sub>, Et<sub>3</sub>N, DCM; (g) H<sub>2</sub>NCH<sub>2</sub>CH<sub>2</sub>CH<sub>2</sub>CH<sub>2</sub>CH<sub>2</sub>NH<sub>2</sub>, Et<sub>3</sub>N, DCM.

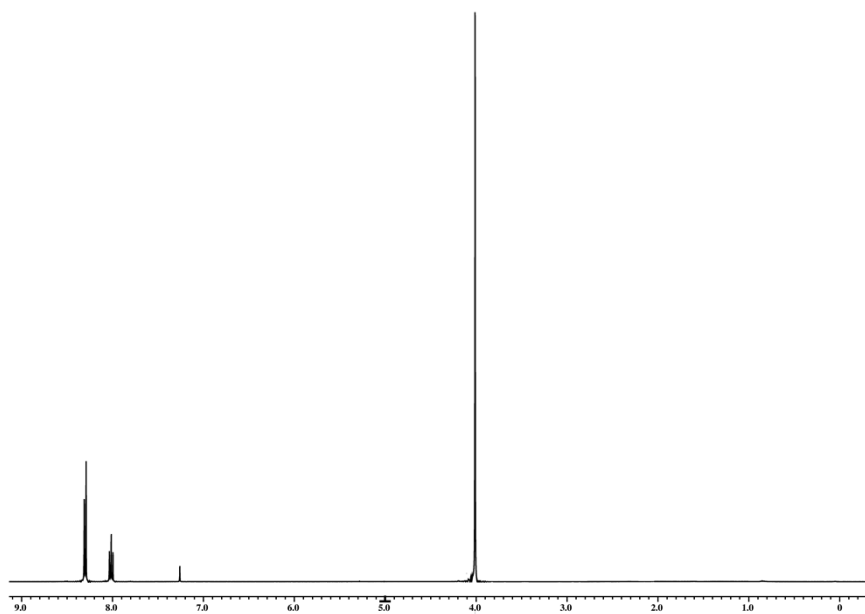

**Figure S19:**  $^1\text{H}$  NMR ( $\text{CDCl}_3$ , 500MHz,  $\delta_{\text{ppm}}$ ) spectra of compound **6**.

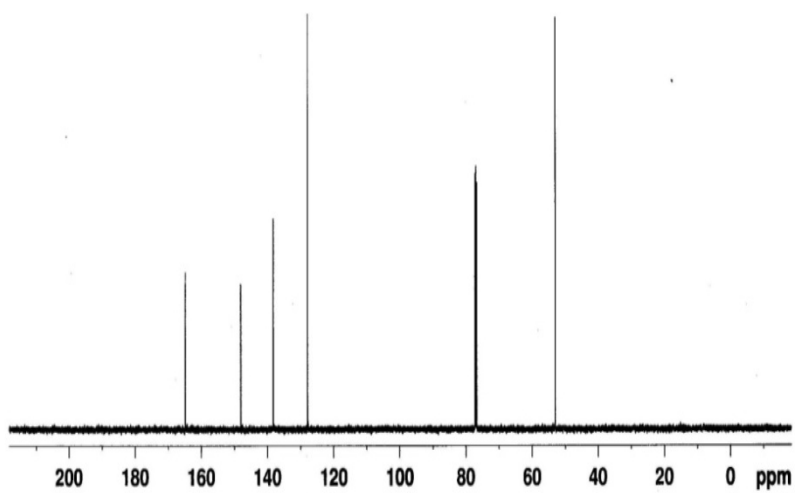

**Figure S20:**  $^{13}\text{C}$  NMR ( $\text{CDCl}_3$ , 125MHz,  $\delta_{\text{ppm}}$ ) spectra of compound **6**.

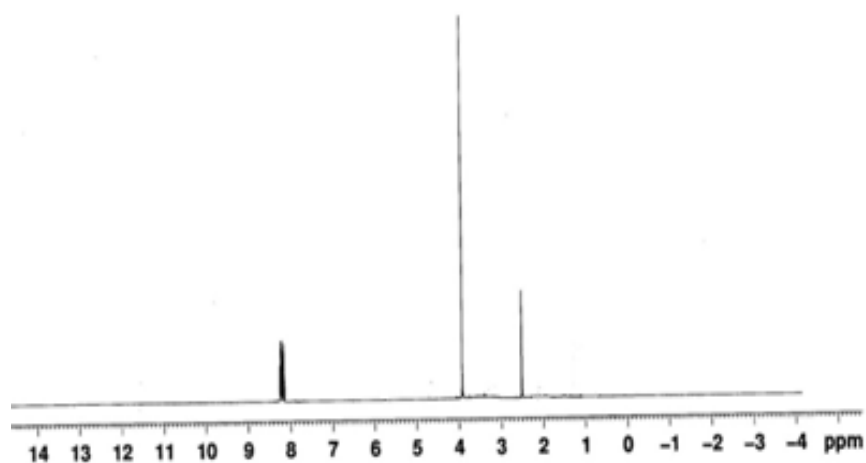

**Figure S21:**  $^1\text{H}$  NMR (DMSO-*d*<sub>6</sub>, 500 MHz,  $\delta_{\text{ppm}}$ ) spectra of compound 7.

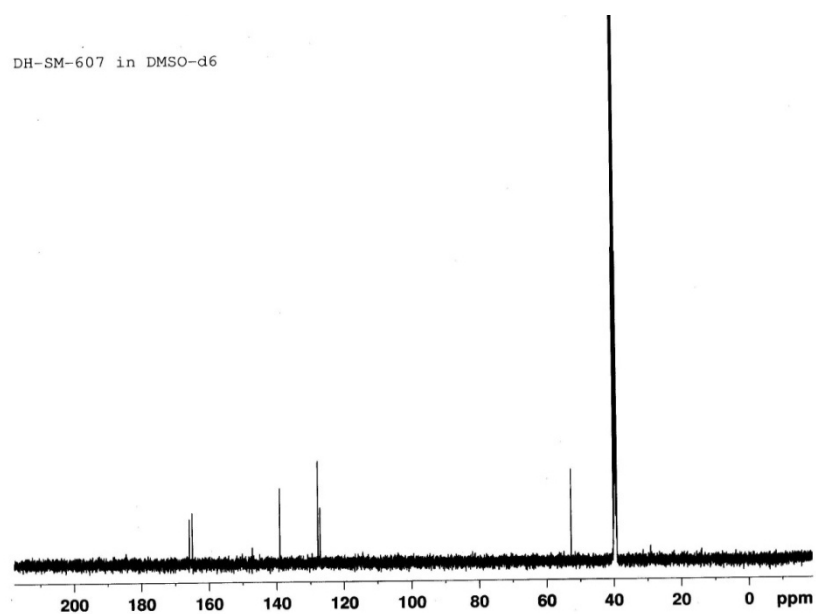

**Figure S22:**  $^{13}\text{C}$  NMR (DMSO-*d*<sub>6</sub>, 125MHz,  $\delta_{\text{ppm}}$ ) spectra of compound 7.

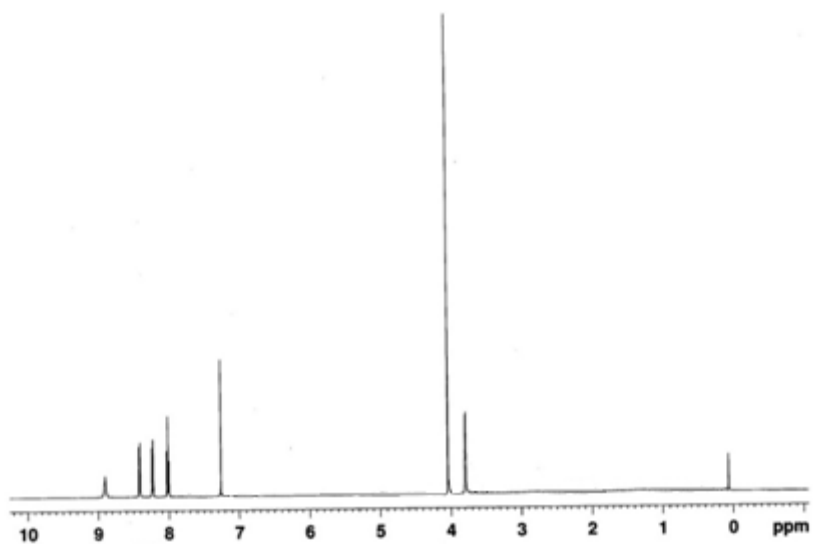

**Figure S23:**  $^1\text{H}$  NMR ( $\text{CDCl}_3$ , 500MHz,  $\delta_{\text{ppm}}$ ) spectra of bisamide **1**.

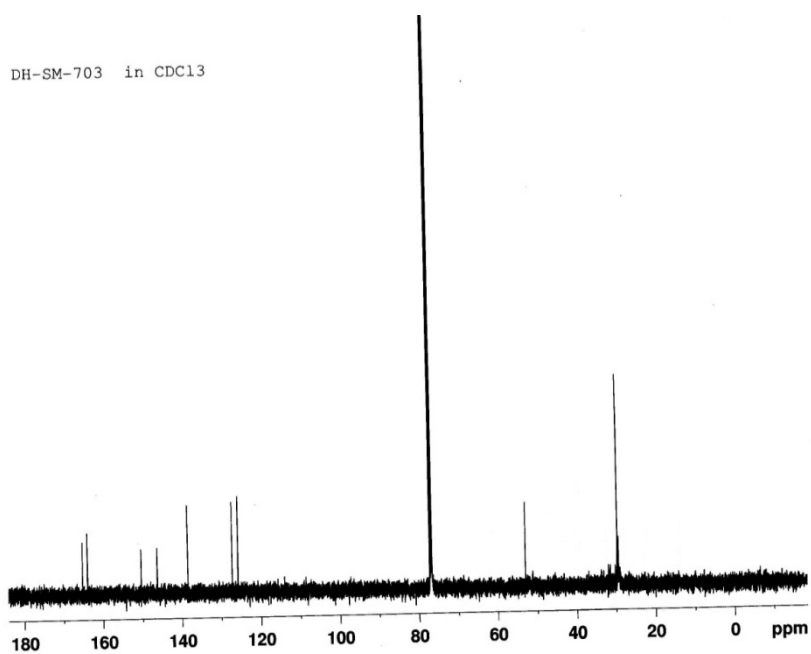

**Figure S24:**  $^{13}\text{C}$  NMR ( $\text{CDCl}_3$ , 125MHz,  $\delta_{\text{ppm}}$ ) spectra of bisamide **1**.

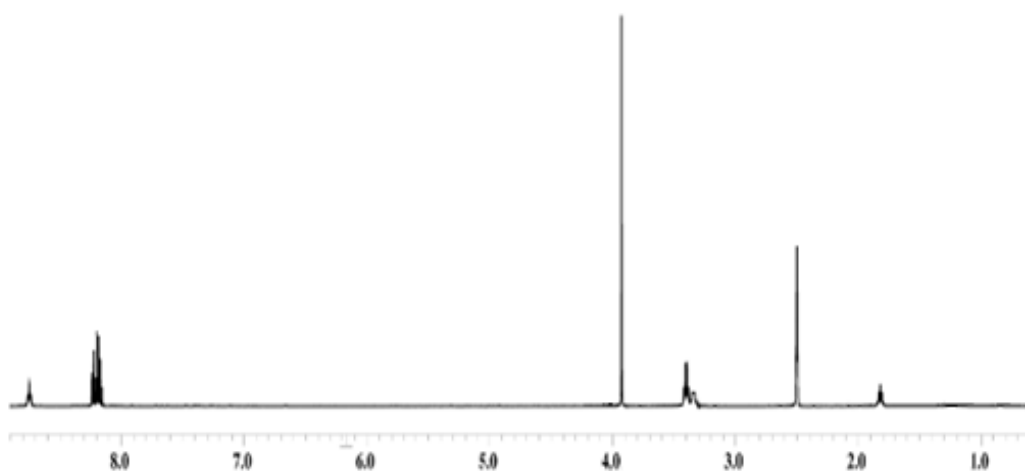

**Figure S25:**  $^1\text{H}$  NMR ( $\text{DMSO-}d_6$ , 500MHz,  $\delta_{\text{ppm}}$ ) spectra of bisamide **2**.

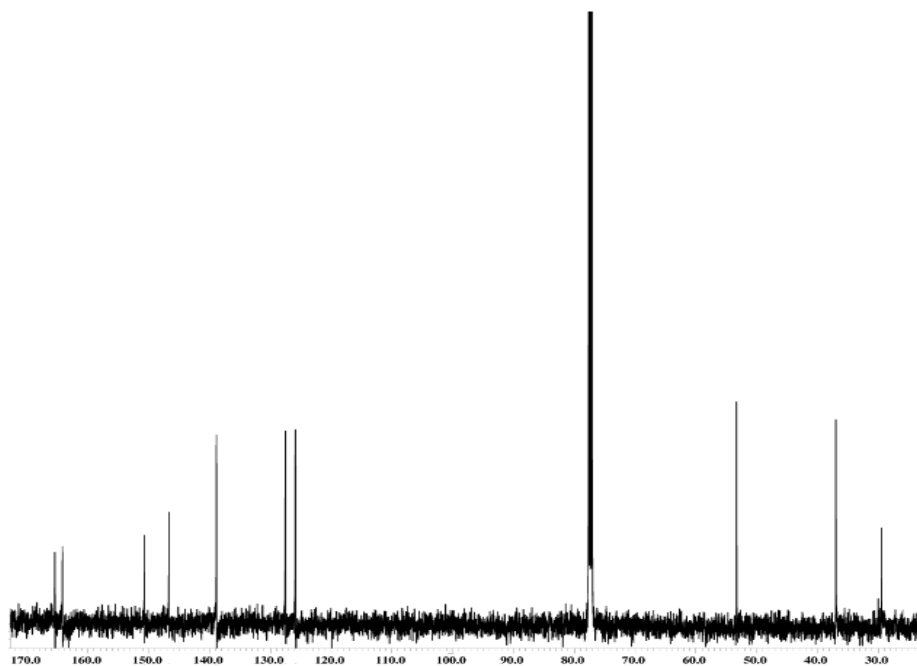

**Figure S26:**  $^{13}\text{C}$  NMR ( $\text{CDCl}_3$ , 125MHz,  $\delta_{\text{ppm}}$ ) spectra of bisamide **2**.



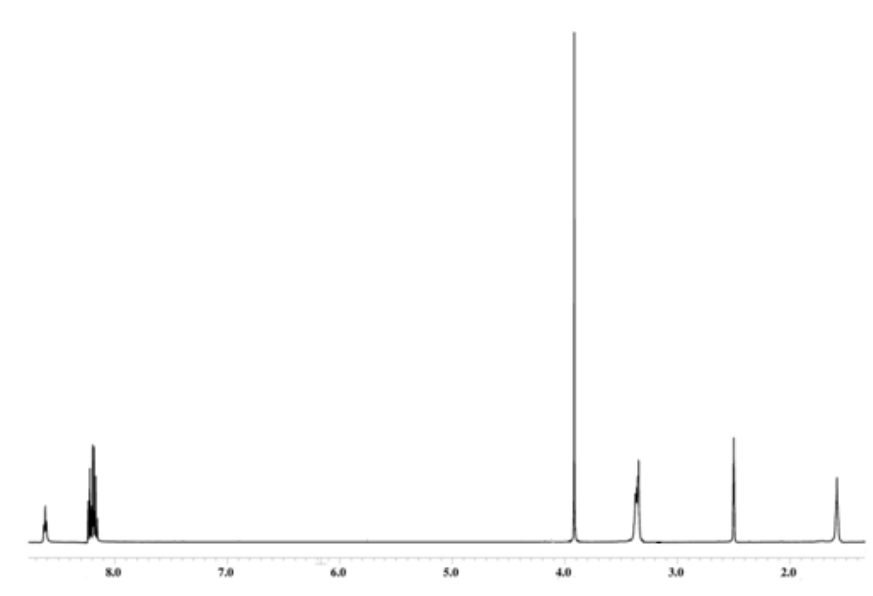

**Figure S27:**  $^1\text{H}$  NMR ( $\text{DMSO-}d_6$ , 500MHz,  $\delta_{\text{ppm}}$ ) spectra of bisamide **3**.

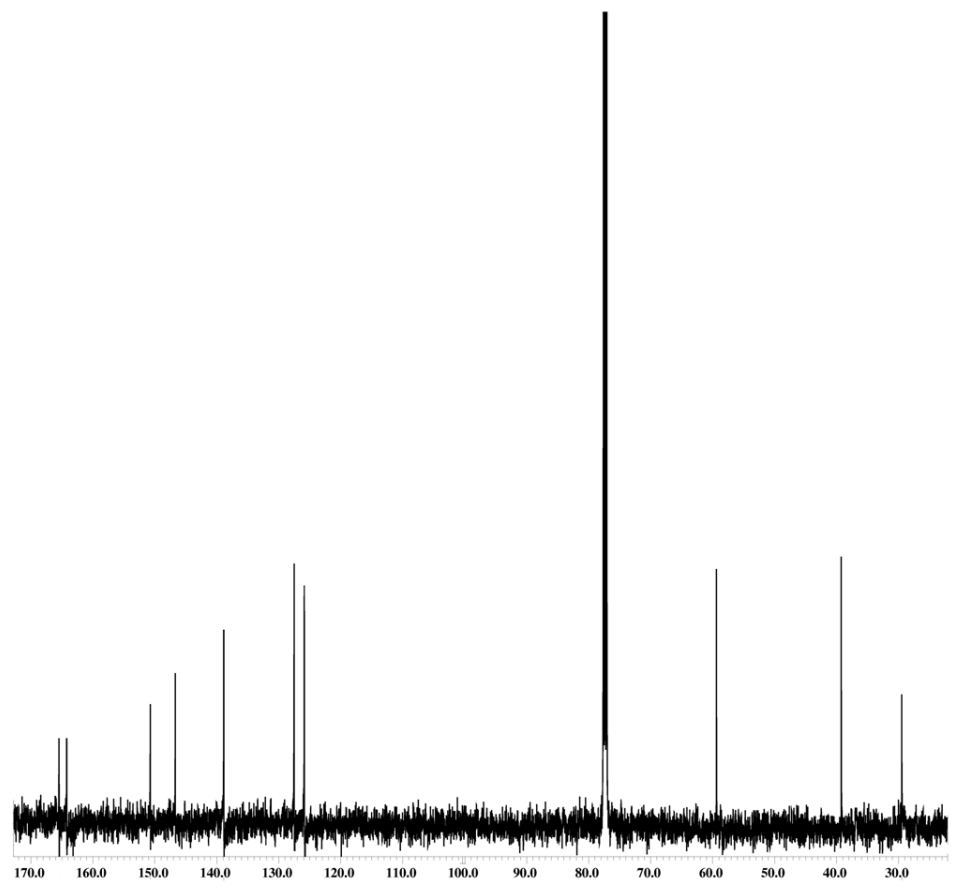

**Figure S28:**  $^{13}\text{C}$  NMR ( $\text{CDCl}_3$ , 125MHz,  $\delta_{\text{ppm}}$ ) spectra of bisamide **3**.

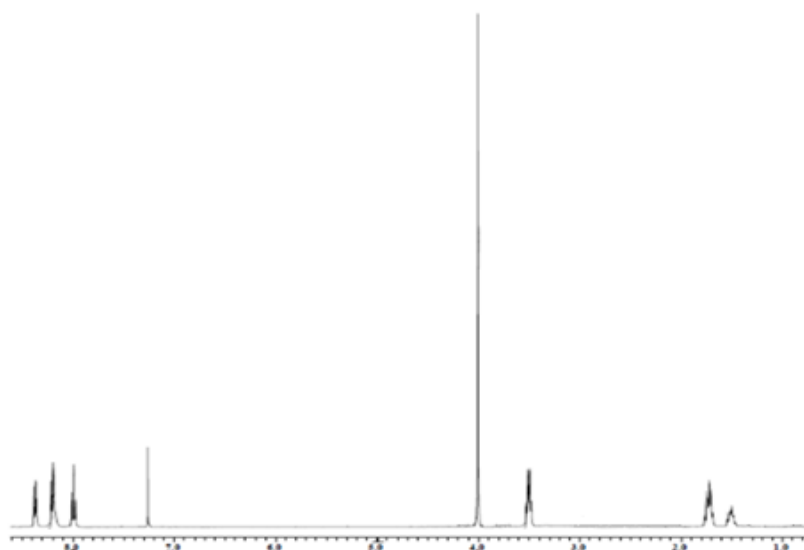

**Figure S29:**  $^1\text{H}$  NMR ( $\text{CDCl}_3$ , 500MHz,  $\delta_{\text{ppm}}$ ) spectra of bisamide **4**.

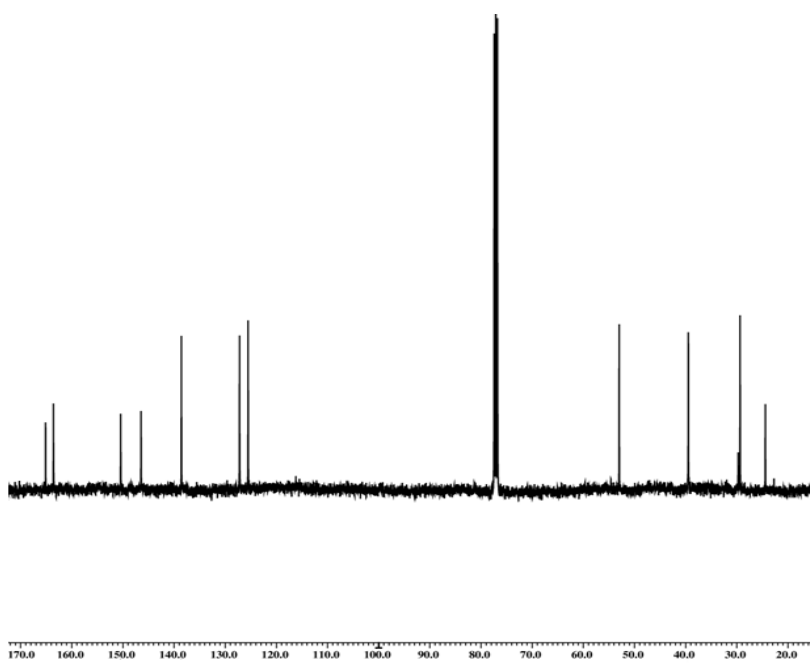

**Figure S30:**  $^{13}\text{C}$  NMR ( $\text{CDCl}_3$ , 125MHz,  $\delta_{\text{ppm}}$ ) spectra of bisamide **4**.
